# Supplementary material for: Live cell single molecule-guided Bayesian localization super resolution microscopy
Source: PubMed Central journal article supplement — Cell Res. 2016 Dec 30;27(5):713–6. doi: 10.1038/cr.2016.160 (PMC5520847; doi:10.1038/cr.2016.160), 2016-12-30
Supplement: cr2016160x2.pdf [file cr2016160x2.pdf]

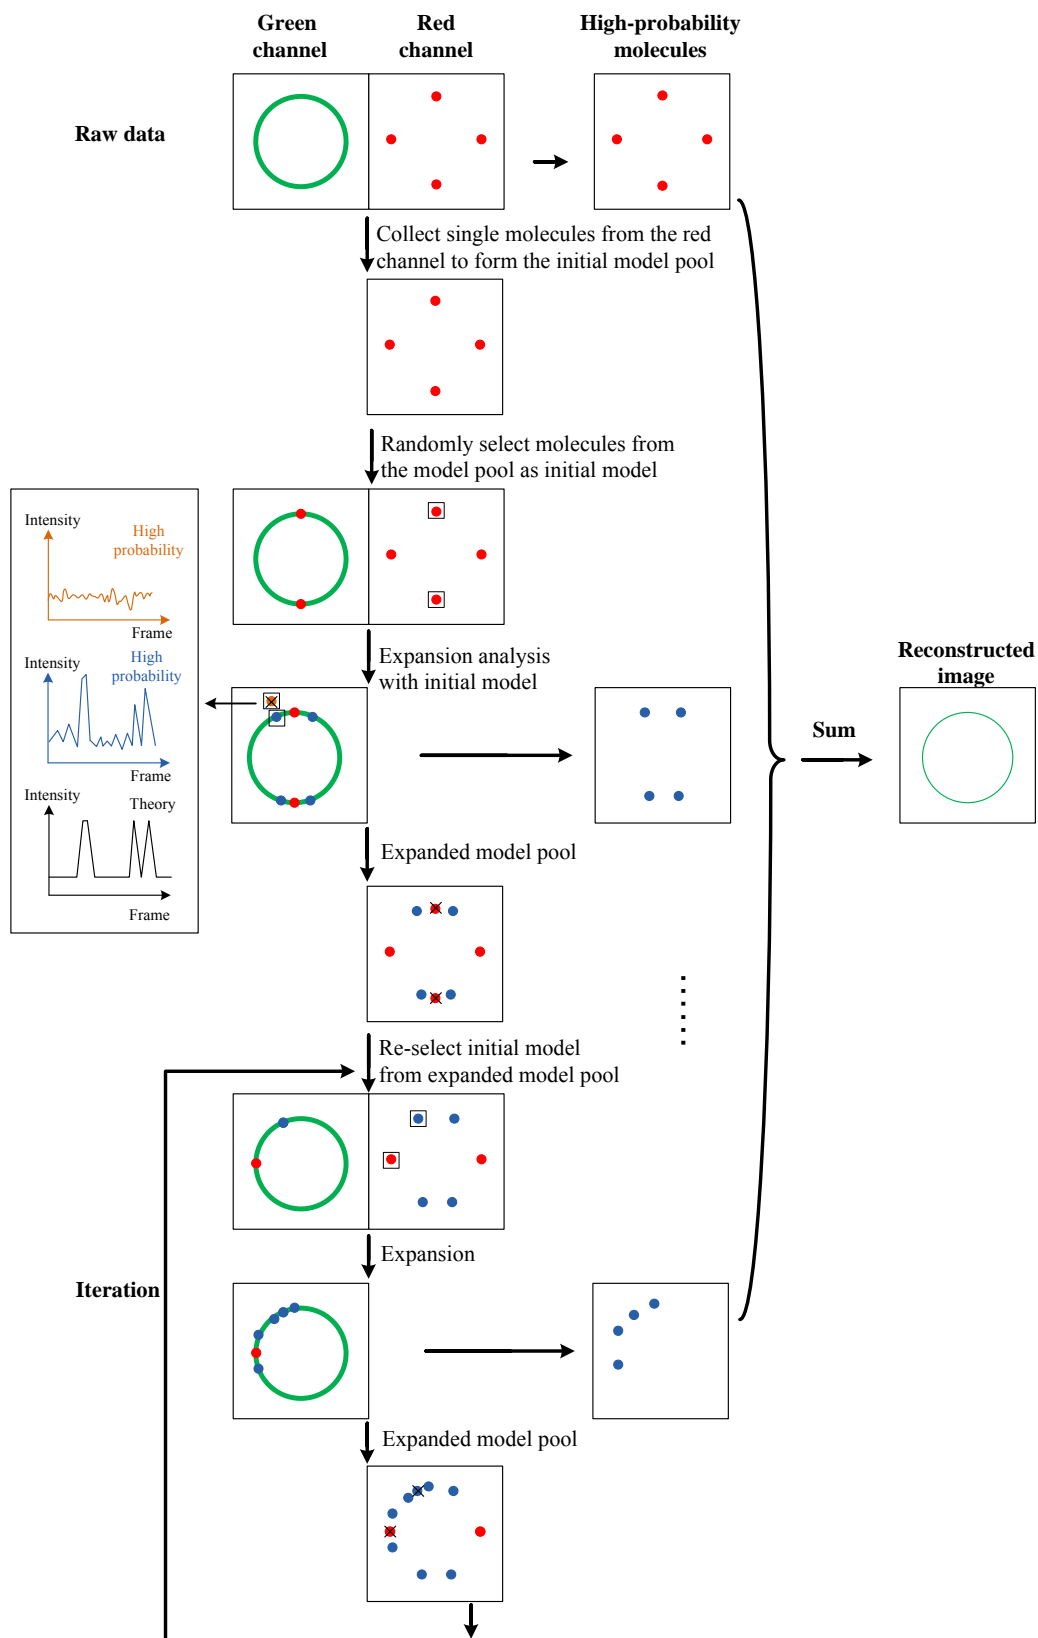

**Supplementary information, Figure S2:** Schematic diagram of the SIMBA algorithm. For a detailed description of algorithm, see Supplementary Note.
